# Supplementary material for: Retrospective Parameter Estimation and Forecast of Respiratory Syncytial Virus in the United States
Source: PubMed Central journal article supplement (PMC5055361; doi:10.1371/journal.pcbi.1005133), 2016-10-07

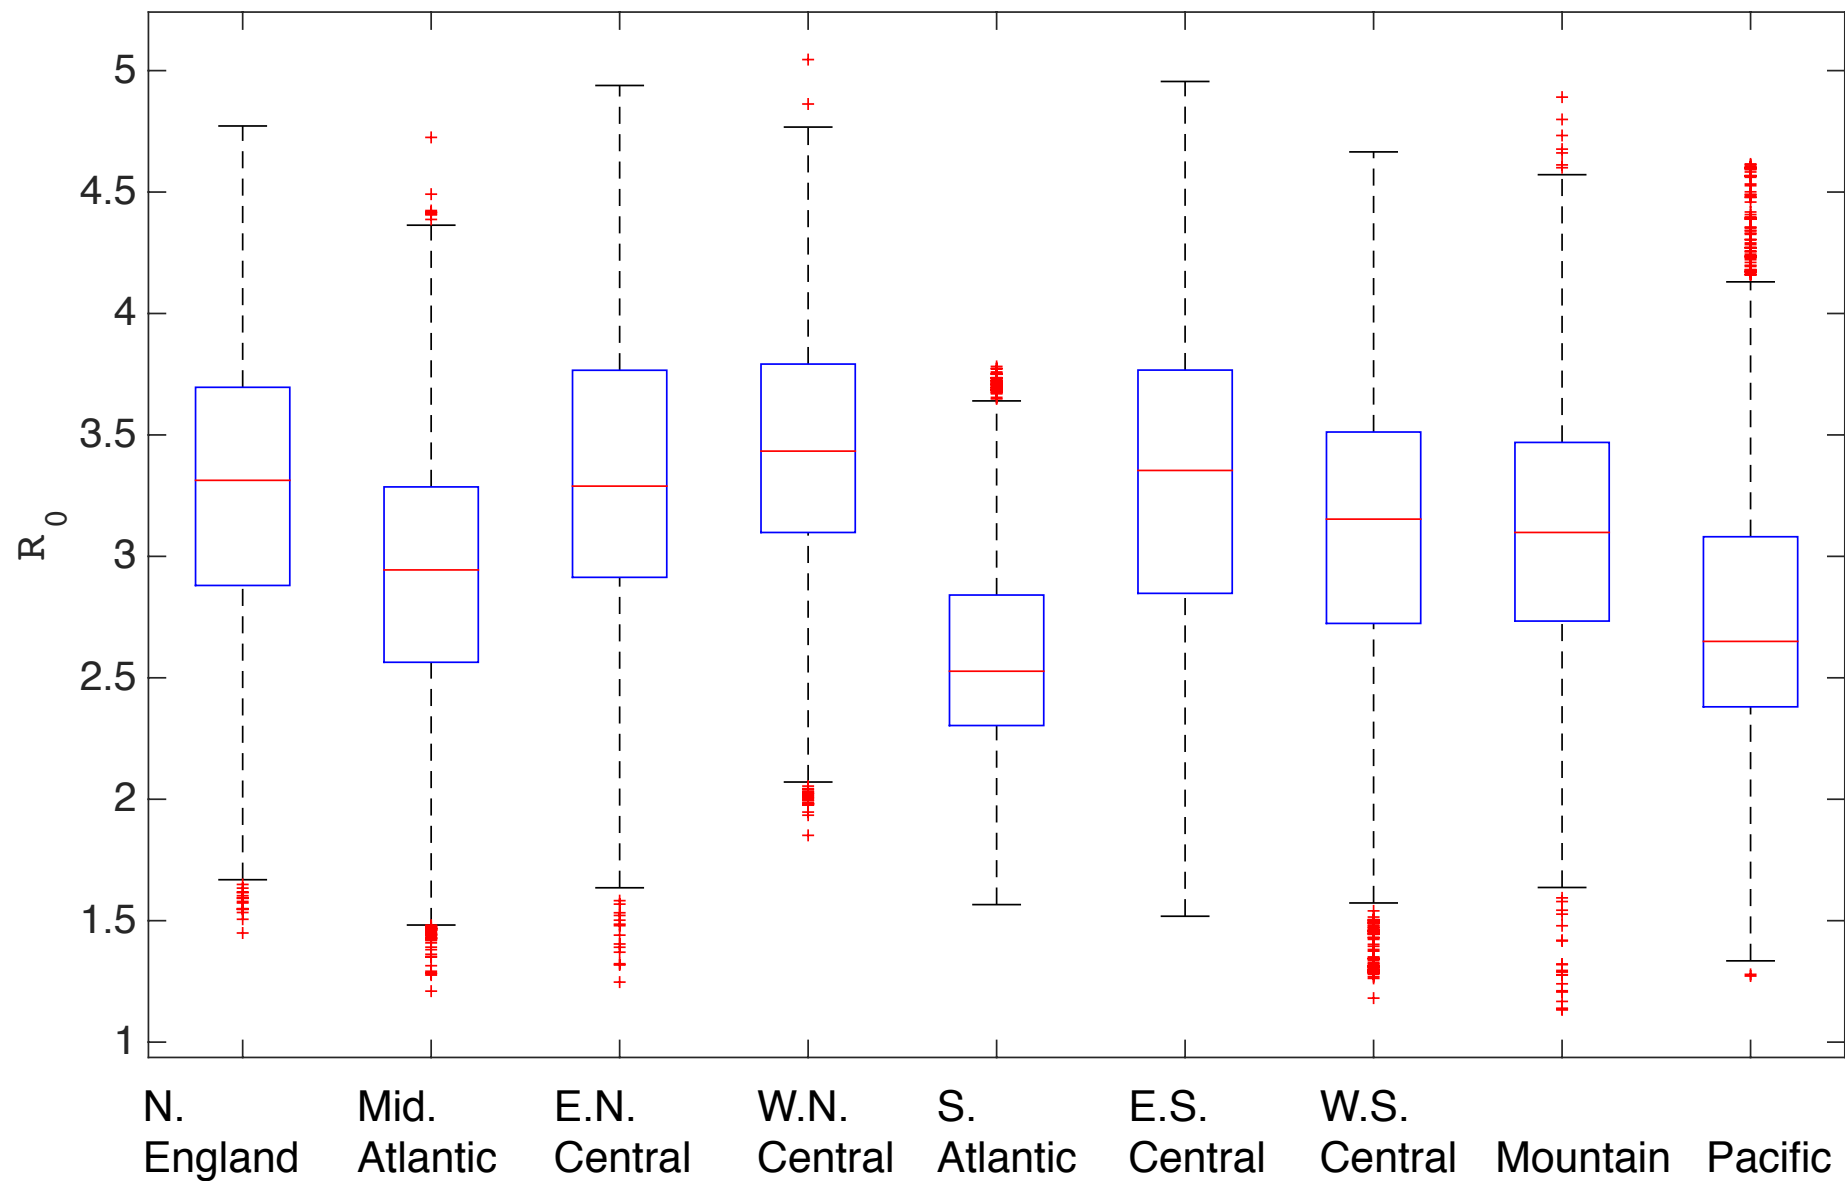

Supplement: pcbi.1005133.s006.pdf [file pcbi.1005133.s006.pdf]
